1  
2  
3  
4  
5  
6  
7  
8  
9  
10  
11  
12  
13  
14  
15  
16  
17  
18  
19

**Evidence for a widespread third system for bacterial polysaccharide export across the outer membrane comprising a composite OPX/ $\beta$ -barrel translocon**

Johannes Schwabe<sup>1</sup>, María Pérez-Burgos<sup>1</sup>, Marco Herfurth<sup>1</sup>, Timo Glatter<sup>2</sup> and Lotte Sogaard-Andersen<sup>1, 3</sup>

<sup>1</sup> Department of Ecophysiology, Max Planck Institute for Terrestrial Microbiology,  
35043 Marburg, Germany

<sup>2</sup> Core Facility for Mass Spectrometry & Proteomics, Max Planck Institute for Terrestrial  
Microbiology, 35043 Marburg, Germany

<sup>3</sup> Corresponding author  
Tel. +49-(0)6421-178201  
Fax +49-(0)6421-178209  
E-mail: [sogaard@mpi-marburg.mpg.de](mailto:sogaard@mpi-marburg.mpg.de)

## 20 Abstract

21 In Gram-negative bacteria, secreted polysaccharides have multiple critical functions. In  
 22 Wzx/Wzy- and ABC transporter-dependent pathways, an outer membrane (OM)  
 23 polysaccharide export (OPX) type translocon exports the polysaccharide across the OM. The  
 24 paradigm OPX protein Wza<sub>E. coli</sub> is an octamer, in which the eight C-terminal domains form an  
 25  $\alpha$ -helical OM pore, and the eight copies of the three N-terminal domains (D1-D3) a  
 26 periplasmic cavity. In synthase-dependent pathways, the OM translocon is a 16- to 18-  
 27 stranded  $\beta$ -barrel protein. In *Myxococcus xanthus*, the secreted polysaccharide EPS is  
 28 synthesized in a Wzx/Wzy-dependent pathway. Here, using experiments and computational  
 29 structural biology, we characterize EpsX as an OM 18-stranded  $\beta$ -barrel protein important for  
 30 EPS synthesis and identify AlgE, a  $\beta$ -barrel translocon of a synthase-dependent pathway, as  
 31 its closest structural homolog. We also find that EpsY, the OPX protein of the EPS pathway,  
 32 only consists of the periplasmic D1 and D2 domains and lacks the domain for spanning the  
 33 OM (henceforth <sup>D1D2</sup>OPX protein). *In vivo*, EpsX and EpsY mutually stabilize each other,  
 34 supporting their direct interaction. Based on these observations, we propose a model  
 35 whereby EpsY and EpsX make up a novel type of translocon for polysaccharide export  
 36 across the OM. Specifically, in this composite translocon, EpsX functions as the OM-  
 37 spanning translocon together with the periplasmic <sup>D1D2</sup>OPX protein EpsY. Based on  
 38 computational genomics, similar composite systems are present widespread in Gram-  
 39 negative bacteria. This model provides a framework for these proteins' future experimental  
 40 characterization.

41

## 42 Introduction

43 Most bacteria secrete one or more polysaccharides. These polysaccharides protect against  
44 environmental stresses and phage infection, contribute to surface colonization and biofilm  
45 formation, have important functions in beneficial and pathogenic human-, animal- and plant-  
46 microbe interactions, provide the basis for serotyping and several anti-bacterial vaccines,  
47 and have many applications in the food, pharmaceutical and medical industry <sup>1-3</sup>. Here, we  
48 focus on export of polysaccharides across the outer membrane (OM) in Gram-negative  
49 bacteria.

50 Secreted polysaccharides are large, chemically diverse molecules. Their synthesis hinges on  
51 three mechanisms and their export across the OM in Gram-negative bacteria on two known  
52 mechanisms <sup>4,5</sup>. In Wzx/Wzy-dependent pathways, biosynthesis is initiated on the  
53 cytoplasmic side of the IM by a phosphoglycosyltransferase (PGT). Subsequently,  
54 glycosyltransferases (GTs) add monosaccharides to generate the repeat unit. The Wzx  
55 flippase "flips" individual repeat units across the IM to the periplasm, where the Wzy  
56 polymerase polymerizes them. On the periplasmic side, the polysaccharide co-polymerase  
57 (PCP), an integral IM protein with an extended periplasmic domain, regulates polymerization  
58 and polysaccharide transfer across the periplasm to the OM <sup>5,6</sup>. A protein of the OM  
59 polysaccharide export (OPX) family exports the polysaccharide across the OM <sup>7,8</sup>. Wza of  
60 *Escherichia coli* is the best-studied OPX protein. In contrast to other pore-forming OM  
61 proteins, the octameric Wza spans the OM using an  $\alpha$ -helical barrel <sup>7</sup>. The periplasmic part of  
62 the OPX protein interacts with the oligomeric PCP to establish a conduit for the  
63 polysaccharide to reach the OM <sup>6,8-10</sup>. In ABC transporter-dependent pathways, synthesis of  
64 the polysaccharide is also initiated on the cytoplasmic side of the IM and fully completed  
65 before translocation across the IM by an ABC transporter <sup>5</sup>. Transfer across the periplasm  
66 involves a PCP, and the polysaccharide is exported across the OM by an OPX protein <sup>5,6</sup>.  
67 Synthase-dependent pathways differ considerably from these two pathways and consist of  
68 only three core components <sup>4</sup>. An IM-embedded synthase with GT activity synthesizes the  
69 polysaccharide and, in parallel, facilitates its translocation across the IM. A tetratricopeptide  
70 repeat (TPR)-containing protein contributes to polysaccharide transfer across the periplasm.  
71 The polysaccharide is exported across the OM through an integral OM 16- to 18-stranded  $\beta$ -  
72 barrel protein as described in structural work on PgaA and BcsC of *E. coli*, and AlgE of  
73 *Pseudomonas aeruginosa* <sup>11-13</sup>.

74 Here, we combine experiments, computational structural biology and genomics to provide  
75 evidence supporting a novel type of polysaccharide OM export mechanism widespread in  
76 Gram-negative bacteria. In the suggested system, a short OPX protein that only comprises

77 periplasmic domains and lacks the domain for spanning the OM functions together with an  
78 OM  $\beta$ -barrel protein to generate a composite OPX/ $\beta$ -barrel translocon.

79

## 80 Results & Discussion

### 81 Myxobacterial gene clusters for secreted polysaccharides encode an OM $\beta$ -barrel protein

82 The Gram-negative deltaproteobacterium *Myxococcus xanthus* secretes three  
83 polysaccharides, i.e. exopolysaccharide (EPS), spore coat polysaccharide (SPS) and  
84 biosurfactant polysaccharide (BPS), using three dedicated Wzx/Wzy-dependent pathways  
85 (Figure S1)<sup>14</sup>. In all three systems, the gene annotated as encoding the OPX protein (EpsY,  
86 ExoA, WzaB) is syntenic with a gene encoding a protein of unknown function (EpsX, ExoB,  
87 MXAN\_1916). This synteny is largely conserved in the orthologous myxobacterial gene  
88 clusters (Figure S1).

89 EpsX, ExoB and MXAN\_1916 have a type 1 signal peptide based on sequence analysis.  
90 AlphaFold structural models (Methods) predict with high confidence that they fold into 18-  
91 stranded antiparallel  $\beta$ -barrels with an elliptical shape and a central channel (Figure 1A,  
92 Figure S2A-C). As expected, the parts of the proteins predicted with low confidence  
93 correspond to extracellular loops connecting the antiparallel  $\beta$ -strands (Figure S2A-C). The  
94 three AlphaFold models could readily be superimposed (Figure S2D), documenting that the  
95 proteins have the same fold overall. ExoB is important for SPS biosynthesis by an unknown  
96 mechanism<sup>15</sup>, and MXAN\_1916 is an OM protein<sup>16</sup>, but it is not known whether it is  
97 important for BPS synthesis. Altogether, these data support that EpsX, ExoB and WzaB are  
98 integral OM 18-stranded  $\beta$ -barrel proteins. To investigate the function of these proteins and  
99 their orthologs, we focused on EpsX.

### 101 EpsX is important for EPS biosynthesis

102 To investigate the function of EpsX, we generated an in-frame deletion in *epsX* ( $\Delta$ *epsX*).  
103 Using plate-based colorimetric assays with Congo red or Trypan blue as readouts of EPS  
104 synthesis, we observed that wild-type (WT) synthesized EPS. The  $\Delta$ *epsX* mutation, similarly  
105 to the  $\Delta$ *epsZ*,  $\Delta$ *epsV* and  $\Delta$ *epsY* mutations that inactivate genes for proteins in the EPS  
106 pathway (Figure S1)<sup>17-19</sup>, caused strongly reduced EPS synthesis (Figure 1B). EPS is  
107 important for type IV pili (T4P)-dependent motility<sup>14</sup>. Consistently, while WT formed colonies  
108 with long flares at the edge characteristic of T4P-dependent motility, and the  $\Delta$ *pilA* negative  
109 control formed smooth-edged colonies, the  $\Delta$ *epsX* mutant generated short flares at the  
110 colony edge as previously observed for the  $\Delta$ *epsZ*,  $\Delta$ *epsV* and  $\Delta$ *epsY* mutants<sup>17-19</sup> (Figure  
111 1B). The  $\Delta$ *epsX* mutant, similarly to WT and the  $\Delta$ *epsZ*,  $\Delta$ *epsV* and  $\Delta$ *epsY* mutants,  
112 displayed the single cells at the colony edge characteristic of gliding motility, while the  $\Delta$ *gltB*  
113 negative control did not (Figure 1B). The EPS biosynthesis and motility defects of the  $\Delta$ *epsX*  
114 mutant were complemented by ectopic expression of *epsX* (Figure 1B). We conclude that  
115 EpsX is important for EPS synthesis and likely an integral component of the EPS pathway.

In the *E. coli* and *Klebsiella pneumoniae* Wzx/Wzy-dependent pathways for capsule biosynthesis, the OM 18-stranded  $\beta$ -barrel protein Wzi is important for cell surface-anchoring of the capsule but neither for its biosynthesis nor its export<sup>20,21</sup> arguing that Wzi and EpsX have different functions. Moreover, while the  $\beta$ -barrel in the solved structure of Wzi is circular<sup>21</sup> (Figure S2E), the EpsX  $\beta$ -barrel in the AlphaFold model is elliptical (Figure 1A). Wzi also contains an N-terminal  $\alpha$ -helical bundle that occludes the periplasmic side of the  $\beta$ -barrel, and extracellular loops that fold into and occlude the  $\beta$ -barrel on the extracellular side<sup>21</sup>. By contrast, EpsX lacks the N-terminal  $\alpha$ -helical bundle, and the extracellular loops, although modeled with low confidence (Figure S2A), do not fold into the  $\beta$ -barrel, indicating that EpsX is open to the periplasm and possibly also to the cell exterior. This structural comparison also supports the conclusion that EpsX has a function different from Wzi.

Subsequently, by searching for structural homologs of EpsX using Foldseek (Methods), we identified the OM translocon AlgE of the synthase-dependent pathway for alginate export in *P. aeruginosa*<sup>11</sup> as the closest structural homolog. Similar to EpsX in the AlphaFold model, the 18-stranded  $\beta$ -barrel of AlgE in the solved structure has an elliptical shape (Figure 1C). The two proteins could readily be superimposed except for extracellular loops in AlgE that fold into the  $\beta$ -barrel and partially occlude the pore (Figure 1C).

#### EpsX and EpsY mutually stabilize each other

There are several reported examples in *M. xanthus* of interacting OM, periplasmic and IM proteins that stabilize each other<sup>22-25</sup>. Consequently, to identify potential EpsX interaction partners, we performed whole-cell label-free quantitative (LFQ) mass spectrometry-based proteomics (Methods) focusing on the Eps proteins.

In WT, we detected all Eps proteins except for the integral IM proteins Wzx<sub>EPS</sub> and Wzy<sub>EPS</sub> (Figure 1D). In the  $\Delta$ epsX mutant, the OPX protein EpsY accumulated at a significantly reduced level (Figure 1D). Conversely, in the  $\Delta$ epsY mutant, EpsX was not detected, and accumulation of the PCP EpsV was significantly reduced (Figure 1D). By contrast, the  $\Delta$ epsZ mutant, which lacks the PGT for initiating EPS synthesis, had slightly decreased (EpsA), increased (Wzx<sub>EPS</sub>, EpsY and EpsX), or WT levels of the Eps proteins (Figure 1D). These observations support that the decreased accumulation of EpsY in the  $\Delta$ epsX mutant and EpsX and EpsV in the  $\Delta$ epsY mutant is not caused by lack of EPS biosynthesis and export *per se*. Some GTs are also slightly but significantly reduced in the  $\Delta$ epsX and  $\Delta$ epsY mutants (Figure 1D). Here, we focused on the significant accumulation dependency of EpsX, EpsY and EpsV. Importantly, reverse-transcriptase quantitative PCR (RT-qPCR) provided evidence that the changes in EpsX, EpsY and EpsV levels are independent of transcription in

the  $\Delta epsX$  and  $\Delta epsY$  mutants (Figure 1D). We conclude that the OM  $\beta$ -barrel protein EpsX and the OPX protein EpsY mutually stabilize each other and EpsY stabilizes the PCP EpsV.

These findings agree with OPX and PCP proteins interacting in the periplasm<sup>8-10</sup>. They also support the proposal that EpsX, EpsY and EpsV form a complex that spans the cell envelope. To investigate how these proteins could interact, we first analyzed EpsY and its homologs.

#### Myxobacterial OPX proteins are short and only comprise two periplasmic domains

In the Wza<sub>E. coli</sub> octamer, individual protomers have four structural domains (D1-D4)<sup>7</sup> (Figure 2A): The N-terminal D1-D3 are periplasmic, with D1 containing the characteristic polysaccharide export sequence (PES) motif. D2 and D3 are structurally related and have a  $\beta$ -grasp fold<sup>26,27</sup>. The C-terminal D4 is an amphipathic  $\alpha$ -helix, which is inserted in the OM. In the octamer, the eight copies of D1-D3 generate a periplasmic cavity, and the eight C-terminal  $\alpha$ -helices create the  $\alpha$ -helical barrel in the OM (Figure 2A). Wza has a type 2 signal peptide and is N-terminally acylated<sup>7</sup>, which is important for OM integration<sup>26,28</sup>.

Based on sequence analysis and a high confidence AlphaFold structural model, EpsY only contains D1 with the PES motif and D2 and lacks D3 and, most strikingly, D4 (Figure 2B; Figure S3A). The two EpsY domains could readily be superimposed on the corresponding domains in a Wza protomer (Figure 2B). Using AlphaFold-Multimer (Methods), EpsY with high confidence could generate an octamer in which D1 and D2 form a stacked, ring-like structure with a central cavity, similar to the Wza counterparts (Figure 2C; cf. Figure 2A, D; Figure S4A). The Wza octamer is closed at the periplasmic base of D1 by a so-called tyrosine ring (Figure 2D); however, this tyrosine ring is lacking in the EpsY octamer (Figure 2C). As in the monomer model (Figure 2B), the acylated N-terminal cysteine would be placed on top of D2 (Figure 2C), facilitating the OM association of octameric EpsY. From here on, we refer to OPX proteins that only comprise D1 and D2 as <sup>D1D2</sup>OPX proteins.

Remarkably, EpsY orthologs in other myxobacteria are also of the <sup>D1D2</sup>OPX type (Figure S5). In addition, the OPX proteins for SPS (ExoA) and BPS (WzaB) export, as well as their orthologs, are of the <sup>D1D2</sup>OPX type (Figure 2B; Figure S3B-C; Figure S5). Except for one, all these <sup>D1D2</sup>OPX proteins have a type 2 signal peptide and are predicted lipoproteins (Figure S5). Thus, all 48 identified OPX proteins in myxobacteria are <sup>D1D2</sup>OPX proteins and, most strikingly, lack D4 for generating the OM  $\alpha$ -helical pore (Figure S5). Consistent with these findings, a previous classification of OPX proteins<sup>6</sup> defined a subgroup consisting of short OPX proteins that included EpsY and ExoA.

## A <sup>D1D2</sup>OPX protein and an 18-stranded $\beta$ -barrel protein may form a translocon for OM polysaccharide export

<sup>D1D2</sup>OPX proteins lack the domain for spanning the OM and, generally, co-occur with 18-stranded  $\beta$ -barrel proteins (Figure S1, Figure S5). Moreover, the 18-stranded  $\beta$ -barrel proteins are structurally similar to the OM translocon AlgE (Figure 1C), indicating that they can support polysaccharide export across the OM. The <sup>D1D2</sup>OPX protein EpsY and the 18-stranded  $\beta$ -barrel protein EpsX mutually stabilize each other, supporting that they interact. Based on these three lines of evidence, we hypothesized that a <sup>D1D2</sup>OPX protein functions together with a  $\beta$ -barrel protein to create a composite <sup>D1D2</sup>OPX/ $\beta$ -barrel translocon.

To test this hypothesis, we intended to generate a heterocomplex consisting of eight EpsY molecules and one EpsX molecule using AlphaFold-Multimer. However, this amount of sequence information is computationally highly demanding to analyze. Instead, we, therefore, generated a heterocomplex consisting of EpsY D2 (aa 136-219), which is predicted to be close to the OM (Figure 2B-C), and full-length EpsX. In a high confidence AlphaFold-Multimer structural model, EpsX is placed on top of D2 in the EpsY<sup>136-219</sup> octamer (Figure 2E, Figure S4B) in an arrangement strikingly similar to that of the  $\alpha$ -helical barrel "on top" of D3 in the Wza octamer (Figure 2A). Moreover, the diameters of the  $\alpha$ -helical barrel in Wza and the EpsX  $\beta$ -barrel in the EpsX/EpsY<sup>136-219</sup> heterocomplex are similar (Figure 2D, F).

To test the specificity of the AlphaFold-Multimer prediction of the EpsX/EpsY<sup>136-219</sup> complex, we attempted to generate a model of an AlgE/EpsY<sup>136-219</sup> heterocomplex. Even in the best of the five predicted models, the AlgE  $\beta$ -barrel clashes with the ring structure of EpsY<sup>136-219</sup>, and the confidence in the relative positioning of AlgE to octameric EpsY<sup>136-219</sup> is low (Figure S4C). Thus, despite EpsX and AlgE being close structural homologs, the low confidence of the AlgE/EpsY<sup>136-219</sup> model suggests high specificity in the EpsX/EpsY<sup>136-219</sup> heterocomplex, as expected for a functionally relevant protein complex.

Altogether, this computational approach and the mutually dependent stability of EpsX/EpsY support that these two proteins form a complex. In this complex, EpsX spans the OM, and EpsY is periplasmic and associated with the OM via the N-terminal lipid group and the interaction to EpsX.

## PCPs in *M. xanthus* may have an extended periplasmic domain

The IM PCP proteins interact with their cognate OPX proteins in the periplasm using a region rich in  $\alpha$ -helices<sup>8-10,29</sup>. In the case of the Wzc-Wza<sub>*E. coli*</sub> complex, the PCP Wzc<sub>*E. coli*</sub> in the solved structure extends ~60Å from the IM into the periplasm<sup>29</sup> (Figure 3A), while the periplasmic part of Wza extends ~100Å from the OM into the periplasm, with each ring



contributing ~30Å<sup>7</sup>. This gives an estimated periplasmic height of a Wzc-Wza complex of ~160Å.

EpsY is important for the stability of the PCP EpsV (Figure 1D), supporting that the two proteins interact. This raises the question of how the EpsY<sup>D1D2</sup>OPX protein would be able to bridge the periplasm together with its EpsV PCP partner. A high confidence AlphaFold model of monomeric EpsV supports that it has two IM trans-membrane α-helices and a periplasmic domain rich in α-helices (Figure 3B; Figure S6A), similar to other PCPs<sup>6</sup>. The periplasmic part of EpsV is composed of two α-helical stretches with a length of ~100Å and ~75Å and connected by linkers. Depending on the conformation of the α-helical stretches in EpsV, the EpsY/EpsV complex could, thus, have a height of ~160-240Å across the periplasm, supporting that they can jointly span the periplasm.

Similarly, monomeric ExoC of the SPS and WzcB of the BPS pathways have long α-helical periplasmic regions in high confidence AlphaFold models (Figure 3B; Figure S6B-C). Altogether, these *in silico* analyses support the idea that <sup>D1D2</sup>OPX proteins function together with a PCP with an extended periplasmic part.

#### Coupled genes for short periplasmic OPX proteins and OM β-barrel proteins are widespread in Gram-negative bacteria.

41 of the 48 myxobacterial genes for <sup>D1D2</sup>OPX proteins are syntenic with a gene encoding an 18-stranded β-barrel protein (Figure S1; Figure S5). We took advantage of this observation to assess bioinformatically how widespread short, periplasmic OPX proteins are and whether they are coupled with an OM β-barrel protein. Specifically, we identified OPX candidates in 6,607 fully sequenced prokaryotic genomes across 49 phyla using the PES motif (Pfam 02563) as described<sup>6</sup>. To substantiate that the identified proteins are part of a polysaccharide biosynthesis pathway, we only included OPX candidate genes with a polysaccharide biosynthesis gene within five genes upstream or downstream (Methods). In total, we identified 4,257 OPX proteins, and subsequently used 2,749 representative proteins to determine whether they have a C-terminal α-helix and/or are coupled to an OM β-barrel protein (Methods). To determine the coupling of OPX proteins and OM β-barrel proteins, we searched for genes encoding OM β-barrel proteins within five genes of a gene encoding an OPX protein (Methods). After verifying the β-barrel fold and OM localization computationally (Methods), we identified 486 such OM β-barrel proteins.

The 2,749 OPX proteins range in length from 138 to 1,728 aa (Figure 4A). Interestingly, the length distribution of the 486 OPX proteins with a coupled β-barrel protein is highly skewed towards shorter OPX proteins (Figure 4A-B). Based on the size distribution of OPX proteins

with a coupled  $\beta$ -barrel protein, and because EpsY, ExoA and WzaB are 217 aa, 190 aa and 204 aa, respectively, we empirically defined a size cut-off for short OPX proteins of 280 aa (Figure 4A-B). We built a phylogenetic tree of all 2,749 OPX proteins based on their PES motif and found these proteins in 28 phyla (Figure 4C). We then located the branches of the tree that correspond to OPX proteins with a size of  $\leq 280$  aa, and found that those with a coupled  $\beta$ -barrel protein are present in 10 phyla (Figure 4C).

1,230 OPX proteins are  $\leq 280$  aa, and among these, 453 proteins have a coupled  $\beta$ -barrel protein (Figure 4B-C). Conversely, 93% of the  $\beta$ -barrel proteins are coupled to an OPX protein  $\leq 280$  aa. Interestingly, among the 777 OPX proteins  $\leq 280$  aa and without a coupled  $\beta$ -barrel protein, 535 have a C-terminal  $\alpha$ -helix (Figure 4B-C) and are mostly found in the Bacteroidetes (Figure 4C). Thus, generally, we observe a dichotomy among the 1,230 OPX proteins  $\leq 280$  aa. Typically, these OPX proteins have either a coupled  $\beta$ -barrel protein and no C-terminal  $\alpha$ -helix (453 proteins) or no coupled  $\beta$ -barrel protein but a C-terminal  $\alpha$ -helix (535 proteins). For the latter group of OPX proteins, we suggest that they likely function similarly to Wza.

Focusing on the 453 OPX proteins  $\leq 280$  aa with a coupled  $\beta$ -barrel protein and no C-terminal  $\alpha$ -helix, we found, based on genomic context, that 185 are part of a Wzx/Wzy-dependent pathway, 14 of an ABC transporter-dependent pathway, and 287 were not assigned to a pathway because the closest polysaccharide biosynthesis gene encodes a PCP and some of these proteins can be difficult to assign to a specific type of pathway<sup>6</sup>. Among the short OPX/ $\beta$ -barrel couples identified, we found VpsN/VpsM of *Vibrio cholerae* (Figure 4A, C-D). These two proteins are important for *Vibrio* polysaccharide (VPS) synthesis, biofilm formation and intestinal colonization in a mouse model<sup>30</sup>, thus, validating the outlined computational approach. Analysis of the domain architecture of the short OPX proteins is difficult because, except for the PES motif in the D1 domain, their sequences are not well-conserved. Therefore, to analyze the domain architecture of the 453 short OPX proteins with a coupled  $\beta$ -barrel protein, we analyzed the domain structure of five proteins  $\leq 200$  aa and five proteins  $> 250$  aa. Intriguingly, the five proteins with a length  $< 200$  aa all had the <sup>D1</sup>D<sup>2</sup>OPX architecture, while the proteins  $> 250$  aa had a <sup>D1</sup>D<sup>2</sup>D<sup>2</sup>OPX architecture (Figure 4D; Figure S7).

We conclude that the coupling between <sup>D1</sup>D<sup>2</sup>OPX proteins and OM  $\beta$ -barrel proteins is conserved and widespread in Gram-negative bacteria, and this coupling can be extended to include the <sup>D1</sup>D<sup>2</sup>D<sup>2</sup>OPX variants.

## Conclusion

Based on the described experimental data and computational analyses, we propose that polysaccharides can be exported across the OM via a composite periplasmic OPX

protein/OM  $\beta$ -barrel protein translocon (Figure 5). The domain architecture of the periplasmic OPX proteins can be  $D^{1D2}$ OPX or  $D^{1D2D2}$ OPX, giving rise to  $D^{1D2}$ OPX/ $\beta$ -barrel translocons and  $D^{1D2D2}$ OPX/ $\beta$ -barrel translocons. The  $D^{1D2}$ OPX/ $\beta$ -barrel translocons likely function with a PCP with extra-long periplasmic  $\alpha$ -helical regions to span the periplasm and compensate for the short OPX protein (Figure 5). These systems are widespread in Gram-negative bacteria and add to the two established mechanisms for OM export, i.e. the Wza-like OPX protein in Wzx/Wzy- and ABC transporter-dependent pathways and the OM 16- to 18-stranded  $\beta$ -barrel protein in synthase-dependent pathways (Figure 5). In the case of the EpsX/EpsY proteins in *M. xanthus*, we have not shown that they interact directly. However, our model provides a framework for future biochemical and structural studies of EpsX and EpsY as well as of other polysaccharide biosynthesis pathways containing a  $D^{1D2}$ OPX or  $D^{1D2D2}$ OPX protein together with a coupled OM  $\beta$ -barrel protein.

The existence of three systems for polysaccharide export across the OM poses the question of their evolutionary origin. Our current analysis does not suggest an evolutionary scenario for their emergence, and this will likely depend on detailed studies of the taxonomic distribution of the three systems.

## **Acknowledgement**

We thank Dr. Chris Whitfield for many helpful discussions and Dr. Dobromir Szadkowski for providing a Matlab script to illustrate AlphaFold model confidence plots. The Max Planck Society generously supported this work.

## **Conflict of Interest**

The authors declare no conflict of interest.

## **Data Availability**

The data that support the findings of this study are included in the manuscript or in the Supplementary Information. The source data underlying Figure 1A, 1D, 1E, 2B, 2C, 2E, 3B, 4A-C, 4D and Supplementary Figure S6B, S6C are provided as a Source Data file.

## Methods

**Strains and cell growth.** All *M. xanthus* strains are derivatives of the WT DK1622<sup>31</sup> and are listed in Table S1. Plasmids and oligonucleotides used are listed in Table S2 and Table S3. In-frame deletions were generated as described<sup>32</sup>. The plasmid for the complementation experiment was integrated in a single copy by site specific recombination into the Mx8 *attB* site. All strains were verified by PCR. *M. xanthus* was grown at 32°C in 1% CTT broth (1% (w/v) Bacto Casitone, 10mM Tris-HCl pH 8.0, 1mM K<sub>2</sub>HPO<sub>4</sub>/KH<sub>2</sub>PO<sub>4</sub> pH 7.6, 8mM MgSO<sub>4</sub>) or on 1.5% agar supplemented with 1% CTT, and kanamycin (50 µg mL<sup>-1</sup>) when required<sup>33</sup>. Plasmids were propagated in *E. coli* Mach1 at 37°C in lysogeny broth (LB)<sup>34</sup> supplemented with kanamycin (50 µg mL<sup>-1</sup>).

**Detection of EPS.** Colony-based EPS assays were performed as described<sup>17</sup>. Briefly, exponentially growing cells were harvested (3 min, 6000× *g* at room temperature (RT)), resuspended in 1% CTT to a calculated density of 7×10<sup>9</sup> cells mL<sup>-1</sup>, and 20µL aliquots placed on 0.5% agar plates supplemented with 0.5% CTT and 10 or 20µg mL<sup>-1</sup> of Trypan blue or Congo red, respectively. Plates were incubated at 32°C and imaged at 24h.

**Motility assays.** Motility assays were performed as described<sup>35</sup>. Briefly, exponentially growing cells were harvested (3 min, 6000× *g*, RT) and resuspended in 1% CTT to a density of 7×10<sup>9</sup> cells mL<sup>-1</sup>. 5µL of cell suspensions were placed on 0.5% and 1.5% agar (Invitrogen) supplemented with 0.5% CTT, and incubated at 32°C for 24h. Cells were imaged using a M205FA stereomicroscope (Leica) and a DMI8 inverted microscope (Leica) equipped with a Hamamatsu ORCA-flash V2 Digital CMOS camera (Hamamatsu Photonics) and DFC9000 GT camera (Leica), respectively.

**Proteomic analysis using data independent acquisition-mass spectrometry (DIA-MS).** The total proteome of *M. xanthus* cells grown on 1% CTT, 1.5% agar plates was determined as described<sup>24</sup>. Peptide mixtures were then analyzed using liquid chromatography-mass spectrometry on an Exploris 480 instrument connected to an Ultimate 3000 RSLC nano with a Prowflow upgrade and a nanospray flex ion source (all Thermo Scientific). Peptide separation was performed on a reverse phase HPLC column (75µm × 42cm) packed in-house with C18 resin (2.4µm, Dr. Maisch). The following separating gradient was used: 94% solvent A (0.15% formic acid) and 6% solvent B (99.85% acetonitrile, 0.15% formic acid) to 25% solvent B over 95min and to 35% B for additional 25min at a flow rate of 300nL min<sup>-1</sup>. DIA-MS acquisition method was adapted from<sup>36</sup>. Briefly, spray voltage was set to 2.0 kV, funnel RF level at 55, and heated capillary temperature at 275°C. For DIA experiments, full MS resolutions were set to 120,000 at *m/z* 200 with an Automatic Gain Control (AGC) target of 300% and max injection time (IT) of 50ms. Mass range was set to 350–1400. AGC target value for fragment spectra was set at 3000%. 49 windows of 15 Da were used with an

overlap of 1 Da. Resolution was set to 15,000 and IT to 22ms. Stepped HCD collision energy of 25, 27.5 and 30% was used. MS1 data was acquired in profile, MS2 DIA data in centroid mode.

Analysis of DIA data was performed using DIA-NN version 1.8<sup>37</sup> using a UniProt protein database for *M. xanthus*. Full tryptic digest was allowed with two missed cleavage sites, and oxidized methionines (variable) and carbamidomethylated cysteines (fixed). “Match between runs” and “remove likely interferences” options were enabled. The neural network classifier was set to the single-pass mode, and protein inference was based on “genes”. Quantification strategy was set to any LC (high accuracy). Cross-run normalization was set to “RT-dependent”. Library generation was set to “smart profiling”. The DIA-NN “report” output was used to sum the unique peptide intensities and identified proteins were filtered out if q-values exceeded 0.01. Protein intensities were normalized with the Cyclic Loess method using the R-package NormalyzerDE<sup>38</sup>.

RT-qPCR. Total RNA from *M. xanthus* cells grown on 1.5% agar supplemented with 1% CTwas extracted using the Monarch Total RNA Miniprep Kit (New England Biolabs (NEB)). Briefly, 10<sup>9</sup> cells were scraped off the agar-plates and resuspended in 200μL lysis-buffer (100mM Tris-HCl pH 7.6, 1mg ml<sup>-1</sup> lysozyme), and incubated at 25°C, 5min. RNA purification was performed according to manufacturer's protocol. DNA was removed using Turbo DNase (Thermo Fisher Scientific) and DNase was removed by using the Monarch RNA Cleanup Kit (50μg; NEB). LunaScript RT SuperMix Kit (NEB) was used to generate cDNA using 1μg RNA. qPCR reactions were performed on an Applied Biosystems 7500 Real-Time PCR system using the Luna Universal qPCR MasterMix (NEB) with the primers listed in (Table S3). Data analysis was performed using the comparative C<sub>T</sub> method<sup>39</sup>. *MXAN\_3298*, encoding the elongation factor Tu, served as internal reference gene as in<sup>25</sup>.

Bioinformatics. The phylogenetic tree of myxobacteria was prepared as in<sup>40</sup> in MEGA-X<sup>41</sup> using the Neighbor-Joining method<sup>42</sup> and the genome sequences listed in Table S4.

Full-length protein sequences or sequences in which the signal peptide was identified with SignalP 6.0<sup>43</sup> and removed, were used for AlphaFold and AlphaFold-Multimer modeling via ColabFold<sup>44-46</sup> using the AlphaFold2\_mmseqs2 notebook with default settings, except recycles were set to six. Predicted Local Distance Difference Test (pLDDT) and predicted Alignment Error (pAE) graphs of the five models generated by AlphaFold2\_mmseqs2 notebook were made using a custom made Matlab R2020a (The MathWorks) script. Ranking of the models was performed based on combined pLDDT and pAE values, with the best ranked models used for further analysis and presentation. PyMOL version 2.4.1 (<http://www.pymol.org/pymol>) was used to analyze and visualize the models. Structural

alignments were performed using the PyMOL Alignment plugin with default settings.  
Foldseek was used to identify protein homologs of EpsX in the PDB 100 database <sup>47</sup>.

For the co-occurrence analysis of OPX and OM  $\beta$ -barrel proteins, we generated a database of 6,607 fully sequenced prokaryotic genomes that mirror the KEGG database <sup>48</sup> and comprehensively covers all major prokaryotic phyla. OPX proteins in these genomes were identified with HMMsearch of the HMMER package (v3.3) <sup>49</sup> using the Pfam <sup>50</sup> domain Poly\_Export (PF02563) with the Pfam gathering threshold.

Subsequently, we generated a database corresponding to the proteins encoded by five genes up- and downstream of the identified OPX proteins. This database was searched for the Pfam-domains of polysaccharide synthesis proteins (ABC2\_membrane (PF01061), ABC\_tran (PF00005), Polysacc\_synt (PF01943), Polysacc\_synt3 (PF13440), Wzt\_C (PF14524), Wzy\_C (PF04932), Wzz (PF02706)) to (i) corroborate that the OPX protein is encoded in a polysaccharide synthesis gene cluster, and (ii) assign a pathway to the OPX protein. PCPs identified with the Wzz domain, were additionally analyzed for the presence of the tyrosine kinase-domain to assign them as PCP-2. OPX proteins that were not encoded in a polysaccharide synthesis gene cluster were excluded from further analysis. To remove redundancy in the dataset, OPX protein sequences were clustered to a 90% identity threshold using Cd-hit <sup>51</sup> and further analysis carried out on the resulting set of representative sequences.

To generate the phylogenetic tree of the OPX protein sequences, the sequence matching the Poly\_export domain of the OPX proteins was aligned using MUSCLE <sup>52</sup> and a maximum likelihood tree inferred using IQ-Tree <sup>53</sup> with automated model selection and support calculated with 1000 ultrafast bootstrap replicates. The tree was visualized and annotated using iTOL <sup>54</sup>.

The secondary structure of the OPX proteins was determined using S4pred <sup>55</sup>, and then scanned for an  $\alpha$ -helix within the last 20 C-terminal residues. C-terminal  $\alpha$ -helices were considered positive, if they extended over more than nine residues, and did not contain more than one gap of two residues predicted to be non-helical.

$\beta$ -barrel proteins were initially searched for by using hmmbuild to build an HMM from an alignment of 31 EpsX, ExoB and MXAN\_1916 homologs generated with MUSCLE. In a second step, proteins from the KEGG orthology group VpsM (K20920) were aligned and used to build a second HMM. Both models were used to search the proteins encoded five genes up- and downstream of the genes encoding OPX proteins.  $\beta$ -barrel fold and OM localization of identified proteins was verified using PRED-TMBB2 <sup>56</sup> and PSORTb 3.0 <sup>57</sup>.  $\beta$ -

426 barrel proteins with less than 16  $\beta$ -strands were classified as false-positive and were not  
427 considered further.

428 Statistics. The Welch's *t*-test was performed to determine the statistical differences between  
429 the samples.

430



## References

- 1 Morris, G. & Harding, S. in *Encyclopedia of Microbiology* 482-494 (Elsevier, 2009).
- 2 Sutherland, I. W. Novel and established applications of microbial polysaccharides. *Trends Biotechnol.* **16**, 41-46 (1998).
- 3 Hall-Stoodley, L., Costerton, J. W. & Stoodley, P. Bacterial biofilms: from the natural environment to infectious diseases. *Nat. Rev. Microbiol.* **2**, 95-108 (2004).
- 4 Low, K. E. & Howell, P. L. Gram-negative synthase-dependent exopolysaccharide biosynthetic machines. *Curr. Opin. Struct. Biol.* **53**, 32-44 (2018).
- 5 Whitfield, C., Wear, S. S. & Sande, C. Assembly of bacterial capsular polysaccharides and exopolysaccharides. *Annu. Rev. Microbiol.* **74**, 521-543 (2020).
- 6 Cuthbertson, L., Mainprize, I. L., Naismith, J. H. & Whitfield, C. Pivotal roles of the outer membrane polysaccharide export and polysaccharide copolymerase protein families in export of extracellular polysaccharides in gram-negative bacteria. *Microbiol Mol Biol Rev* **73**, 155-177 (2009).
- 7 Dong, C. *et al.* Wza the translocon for *E. coli* capsular polysaccharides defines a new class of membrane protein. *Nature* **444**, 226-229 (2006).
- 8 Nickerson, N. N. *et al.* Trapped translocation intermediates establish the route for export of capsular polysaccharides across *Escherichia coli* outer membranes. *Proc Natl Acad Sci U S A* **111**, 8203-8208 (2014).
- 9 Reid, A. N. & Whitfield, C. Functional analysis of conserved gene products involved in assembly of *Escherichia coli* capsules and exopolysaccharides: Evidence for molecular recognition between Wza and Wzc for colanic acid biosynthesis. *J. Bacteriol.* **187**, 5470-5481 (2005).
- 10 Collins, R. F. *et al.* The 3D structure of a periplasm-spanning platform required for assembly of group 1 capsular polysaccharides in *Escherichia coli*. *Proc. Natl. Acad. Sci USA* **104**, 2390-2395 (2007).
- 11 Whitney, J. C. *et al.* Structural basis for alginate secretion across the bacterial outer membrane. *Proc. Natl. Acad. Sci USA* **108**, 13083-13088 (2011).
- 12 Wang, Y. *et al.* Structural basis for translocation of a biofilm-supporting exopolysaccharide across the bacterial outer membrane. *J. Biol. Chem.* **291**, 10046-10057 (2016).
- 13 Acheson, J. F., Derewenda, Z. S. & Zimmer, J. Architecture of the cellulose synthase outer membrane channel and its association with the periplasmic TPR domain. *Structure* **27**, 1855-1861.e1853 (2019).
- 14 Pérez-Burgos, M. & Søgaard-Andersen, L. Biosynthesis and function of cell-surface polysaccharides in the social bacterium *Myxococcus xanthus*. *Biol. Chem.* **401**, 1375-1387 (2020).
- 15 Holkenbrink, C., Hoiczky, E., Kahnt, J. & Higgs, P. I. Synthesis and assembly of a novel glycan layer in *Myxococcus xanthus* spores. *J. Biol. Chem.* **289**, 32364-32378 (2014).

- 470 16 Kahnt, J. *et al.* Profiling the outer membrane proteome during growth and development  
471 of the social bacterium *Myxococcus xanthus* by selective biotinylation and analyses of  
472 outer membrane vesicles. *J. Proteome Res.* **9**, 5197-5208 (2010).
- 473 17 Pérez-Burgos, M. *et al.* Characterization of the exopolysaccharide biosynthesis  
474 pathway in *Myxococcus xanthus*. *J. Bacteriol.* **202**, e00335-00320 (2020).
- 475 18 Islam, S. T. *et al.* Modulation of bacterial multicellularity via spatio-specific  
476 polysaccharide secretion. *PLOS Biol.* **18**, e3000728 (2020).
- 477 19 Lu, A. *et al.* Exopolysaccharide biosynthesis genes required for social motility in  
478 *Myxococcus xanthus*. *Mol. Microbiol.* **55**, 206-220 (2005).
- 479 20 Rahn, A., Beis, K., Naismith, J. H. & Whitfield, C. A novel outer membrane protein, Wzi,  
480 is involved in surface assembly of the *Escherichia coli* K30 group 1 capsule. *J Bacteriol*  
481 **185**, 5882-5890 (2003).
- 482 21 Bushell, S. R. *et al.* Wzi is an outer membrane lectin that underpins group 1 capsule  
483 assembly in *Escherichia coli*. *Structure* **21**, 844-853 (2013).
- 484 22 Jakobczak, B., Keilberg, D., Wuichet, K. & Søgaard-Andersen, L. Contact- and protein  
485 transfer-dependent stimulation of assembly of the gliding motility machinery in  
486 *Myxococcus xanthus*. *PLOS Genet* **11**, e1005341 (2015).
- 487 23 Friedrich, C., Bulyha, I. & Søgaard-Andersen, L. Outside-in assembly pathway of the  
488 type IV pili system in *Myxococcus xanthus*. *J Bacteriol* **196**, 378-390 (2014).
- 489 24 Treuner-Lange, A. *et al.* PilY1 and minor pilins form a complex priming the type IVa  
490 pilus in *Myxococcus xanthus*. *Nat Commun* **11**, 5054 (2020).
- 491 25 Herfurth, M. *et al.* A noncanonical cytochrome c stimulates calcium binding by PilY1 for  
492 type IVa pili formation. *Proc. Natl. Acad. Sci USA* **119**, e2115061119 (2022).
- 493 26 Sande, C. *et al.* Structural and functional variation in outer membrane polysaccharide  
494 export (OPX) oroteins from the two major capsule assembly pathways present in  
495 *Escherichia coli*. *J Bacteriol* **201** (2019).
- 496 27 Sathiyamoorthy, K., Mills, E., Franzmann, T. M., Rosenshine, I. & Saper, M. A. The  
497 crystal structure of *Escherichia coli* Group 4 capsule protein GfcC reveals a domain  
498 organization resembling that of Wza. *Biochemistry* **50**, 5465-5476 (2011).
- 499 28 Nesper, J. *et al.* Translocation of Group 1 capsular polysaccharide in *Escherichia coli*  
500 serotype K30: Structural and functional analysis of the outer membrane lipoprotein  
501 Wza. *J. Biol. Chem.* **278**, 49763-49772 (2003).
- 502 29 Yang, Y. *et al.* The molecular basis of regulation of bacterial capsule assembly by Wzc.  
503 *Nat Commun* **12**, 4349 (2021).
- 504 30 Fong, J. C. N., Syed, K. A., Klose, K. E. & Yildiz, F. H. Role of *Vibrio* polysaccharide  
505 (vps) genes in VPS production, biofilm formation and *Vibrio cholerae* pathogenesis.  
506 *Microbiology* **156**, 2757-2769 (2010).
- 507 31 Kaiser, D. Social gliding is correlated with the presence of pili in *Myxococcus xanthus*.  
508 *Proc. Natl. Acad. Sci. USA* **76**, 5952-5956 (1979).

509 32 Shi, X. *et al.* Bioinformatics and experimental analysis of proteins of two-component  
510 systems in *Myxococcus xanthus*. *J Bacteriol* **190**, 613-624 (2008).

511 33 Hodgkin, J. & Kaiser, D. Cell-to-cell stimulation of movement in nonmotile mutants of  
512 *Myxococcus*. *Proc Natl Acad Sci U S A* **74**, 2938-2942 (1977).

513 34 Sambrook, J. & Russell, D. W. *Molecular Cloning: A Laboratory Manual*. 3rd edn, (Cold  
514 Spring Harbor Laboratory Press), (2001).

515 35 Shi, W. & Zusman, D. R. The two motility systems of *Myxococcus xanthus* show  
516 different selective advantages on various surfaces. *Proc Natl Acad Sci U S A* **90**, 3378-  
517 3382 (1993).

518 36 Bekker-Jensen, D. B. *et al.* A compact Quadrupole-Orbitrap Mass Spectrometer with  
519 FAIMS interface improves proteome coverage in short LC Gradients. *Mol Cell*  
520 *Proteomics* **19**, 716-729 (2020).

521 37 Demichev, V., Messner, C. B., Vernardis, S. I., Lilley, K. S. & Ralser, M. DIA-NN: neural  
522 networks and interference correction enable deep proteome coverage in high  
523 throughput. *Nat. Methods* **17**, 41-44 (2020).

524 38 Willforss, J., Chawade, A. & Levander, F. NormalyzerDE: Online tool for improved  
525 normalization of omics expression data and high-sensitivity differential expression  
526 analysis. *J. Proteome Res.* **18**, 732-740 (2019).

527 39 Schmittgen, T. D. & Livak, K. J. Analyzing real-time PCR data by the comparative C(T)  
528 method. *Nat Protoc* **3**, 1101-1108 (2008).

529 40 Pérez-Burgos, M., García-Romero, I., Valvano, M. A. & Søgaard Andersen, L.  
530 Identification of the Wzx flippase, Wzy polymerase and sugar-modifying enzymes for  
531 spore coat polysaccharide biosynthesis in *Myxococcus xanthus*. *Mol. Microbiol.* **113**,  
532 1189-1208 (2020).

533 41 Kumar, S., Stecher, G. & Tamura, K. MEGA7: Molecular evolutionary genetics analysis  
534 version 7.0 for bigger datasets. *Mol Biol Evol* **33**, 1870-1874 (2016).

535 42 Saitou, N. & Nei, M. The Neighbor-Joining Method - a new method for reconstructing  
536 phylogenetic trees. *Mol Biol Evol* **4**, 406-425 (1987).

537 43 Teufel, F. *et al.* SignalP 6.0 predicts all five types of signal peptides using protein  
538 language models. *Nat Biotechnol*, <https://doi.org/10.1038/s41587-41021-01156-41583>  
539 (2022).

540 44 Jumper, J. *et al.* Highly accurate protein structure prediction with AlphaFold. *Nature*  
541 **596**, 583-589 (2021).

542 45 Mirdita M., S. K., Moriwaki Y., Heo L., Ovchinnikov S., Steinegger M. ColabFold -  
543 Making protein folding accessible to all. *bioRxiv*, 10.1101/2021.1108.1115.456425  
544 (2021).

545 46 Evans R., O. N. M., Pritzel A., Antropova N., Senior A., Green T., Žídek A., Bates R.,  
546 Blackwell S., Yim J., Ronneberger O., Bodenstein S., Zielinski M., Bridgland A.,  
547 Potapenko A., Cowie A., Tunyasuvunakool K., Jain R., Clancy E., Kohli P., Jumper J.,  
548 Hassabis D. Protein complex prediction with AlphaFold-Multimer. *bioRxiv*,  
549 10.1101/2021.1110.1104.463034 (2021).

550 47 van Kempen, M. *et al.* Foldseek: fast and accurate protein structure search. *bioRxiv*,  
551 10.1101/2022.1102.1107.479398 (2021).

552 48 Kanehisa, M. & Goto, S. KEGG: kyoto encyclopedia of genes and genomes. *Nucleic*  
553 *Acids Res* **28**, 27-30 (2000).

554 49 Eddy, S. R. Accelerated profile HMM searches. *PLOS Comput Biol* **7**, e1002195  
555 (2011).

556 50 Mistry, J. *et al.* Pfam: The protein families database in 2021. *Nucl. Acids Res.* **49**, D412-  
557 D419 (2021).

558 51 Li, W. & Godzik, A. Cd-hit: a fast program for clustering and comparing large sets of  
559 protein or nucleotide sequences. *Bioinformatics* **22**, 1658-1659 (2006).

560 52 Edgar, R. C. MUSCLE: multiple sequence alignment with high accuracy and high  
561 throughput. *Nucl Acids Res* **32**, 1792-1797 (2004).

562 53 Minh, B. Q. *et al.* IQ-TREE 2: New models and efficient methods for phylogenetic  
563 inference in the genomic era. *Mol Biol Evol* **37**, 1530-1534 (2020).

564 54 Letunic, I. & Bork, P. Interactive Tree Of Life (iTOL) v5: an online tool for phylogenetic  
565 tree display and annotation. *Nucl Acids Res* **49**, W293-W296 (2021).

566 55 Moffat, L. & Jones, D. T. Increasing the accuracy of single sequence prediction  
567 methods using a deep semi-supervised learning framework. *Bioinformatics* (2021).

568 56 Tsirigos, K. D., Elofsson, A. & Bagos, P. G. PRED-TMBB2: improved topology  
569 prediction and detection of beta-barrel outer membrane proteins. *Bioinformatics* **32**,  
570 i665-i671 (2016).

571 57 Yu, N. Y. *et al.* PSORTb 3.0: improved protein subcellular localization prediction with  
572 refined localization subcategories and predictive capabilities for all prokaryotes.  
573 *Bioinformatics* **26**, 1608-1615 (2010).

574 58 Schulz, G. E. Beta-barrel membrane proteins. *Curr Opin Struct Biol* **10**, 443-447 (2000).

575 59 Wu, S. S. & Kaiser, D. Regulation of expression of the *pilA* gene in *Myxococcus*  
576 *xanthus*. *J Bacteriol* **179**, 7748-7758 (1997).

577

578

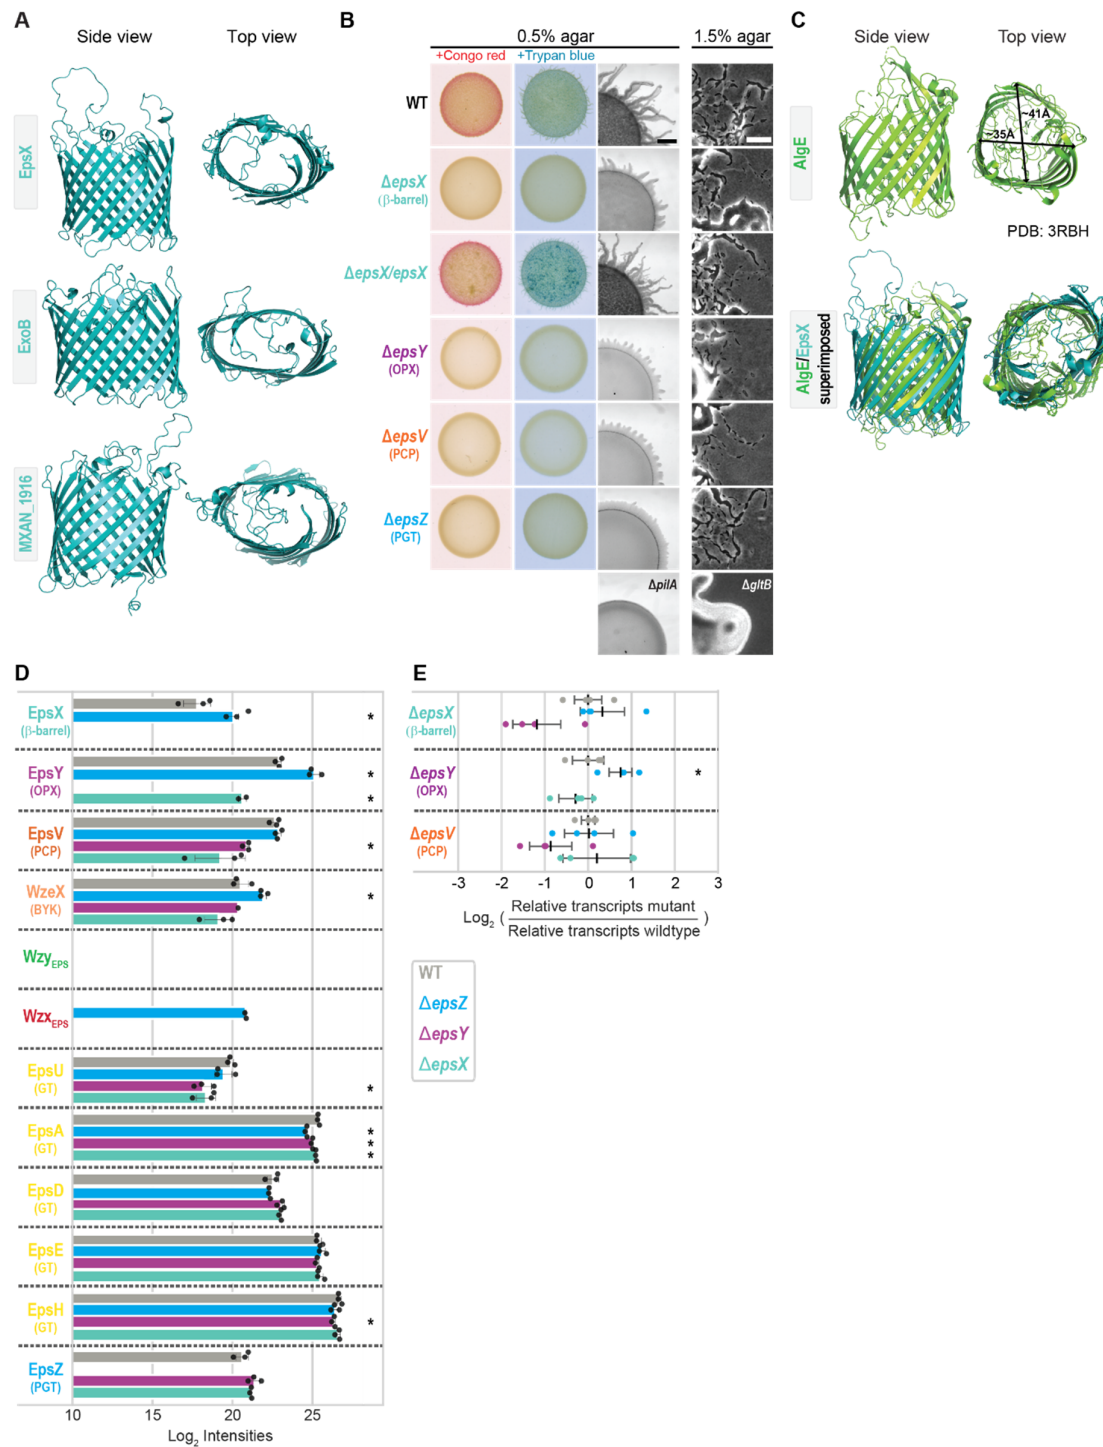

**Figure 1. The 18-stranded  $\beta$ -barrel protein EpsX is an integral part of the EPS pathway**

**A.** AlphaFold models of EpsX, ExoB and MXAN\_1916. Proteins are oriented based on the N- and C-terminus of OM  $\beta$ -barrel proteins being periplasmic<sup>58</sup>. Model ranks 1 are shown.

**B.** Phenotypic characterization of  $\Delta$ epsX mutant. Two left columns, cells were placed on 0.5% agar supplemented with 0.5% CTT and Congo red or Trypan blue and incubated for 24h. Two right columns, T4P-dependent and gliding motility were tested on 0.5% and 1.5%



agar, respectively, supplemented with 0.5% CTT and images recorded after 24h. The  $\Delta pilA$  mutant, which lacks the major pilin of the T4P<sup>59</sup>, and  $\Delta gltB$  mutant, which lacks a component of the gliding motility machinery<sup>22</sup>, served as negative controls for T4P-dependent and gliding motility, respectively. In the complementation strain, *epsX* was expressed from the *pilA* promoter on a plasmid integrated in a single copy at the Mx8 *attB* site. Scale bars: 1mm and 50 $\mu$ m (left, right). Similar results were obtained in three independent experiments.

**C.** Comparison of AlgE and EpsX. Upper panel, lateral and top views of the solved structure of AlgE (PDB 3RBH)<sup>11</sup>. Arrows indicate the external diameter of the  $\beta$ -barrel. Lower panel, superimposition of the solved structure of AlgE and the EpsX AlphaFold model. EpsX is colored in teal. EpsX aligns to AlgE with an RMSD of 6.035Å over 1501 C $\alpha$ .

**D.** EpsX and EpsY mutually stabilize each other and EpsY stabilizes EpsV. Protein amounts in whole-cell proteomes of *M. xanthus* strains were determined using LFQ mass spectrometry-based proteomics (Methods). Normalized Log<sub>2</sub> intensities of Eps proteins in the indicated strains are shown. Missing bars indicate that the proteins were not detected. Data points represent three biological replicates. Error bars, standard deviation (STDEV) based on these replicates. \*  $P < 0.05$  Welch's test. WzeX is important for EPS synthesis and was proposed to act as the BY kinase partner of EpsV<sup>14,18</sup>.

**E.** RT-qPCR analysis of *epsV*, *epsY* and *epsX* transcripts levels. Total RNA was isolated from cells grown as in **D**. Data are shown as Log<sub>2</sub> transcripts in a mutant relative to WT. Individual data points represent four biological replicates with each two technical replicates and are colored according to the strain analyzed. Center marker and error bars represent mean and STDEV. \*  $P < 0.05$  Welch's test.

Source data for **A**, **D**, **E** are provided in the Source Data file.

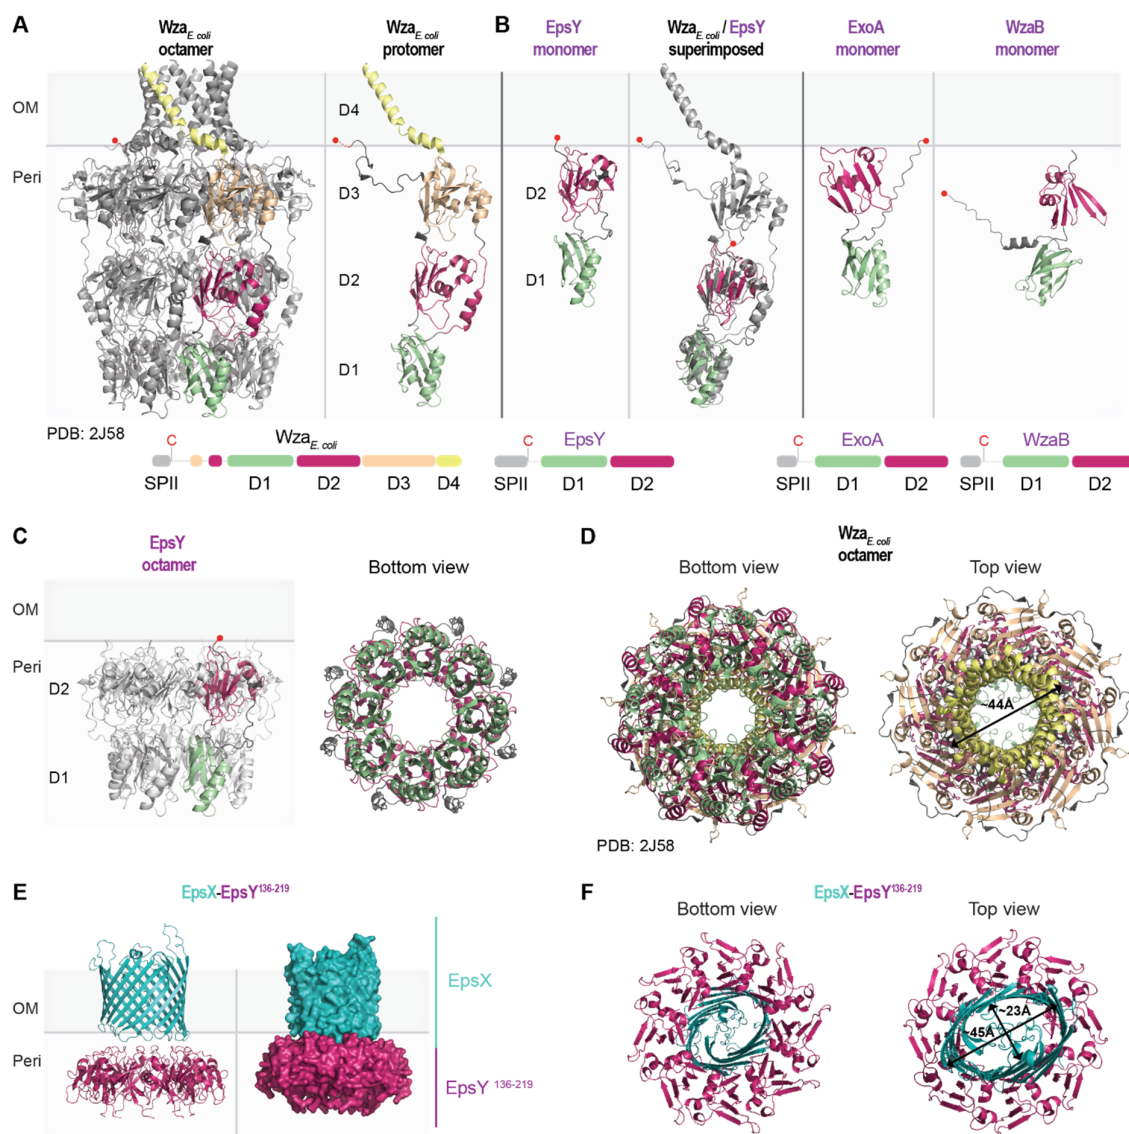

**Figure 2. Structural characterization of the EpsY<sup>D1D2</sup>OPX protein alone and in complex with EpsX, its partner 18-stranded  $\beta$ -barrel protein**

**A.** Structure of *Wza<sub>E. coli</sub>*. Left panel, the solved structure of octameric *Wza* (PDB 2J58)<sup>7</sup>. Right panel, individual *Wza* protomer. The four domains of *Wza* are labeled D1-D4. Light green, D1; Dark pink, D2; Light orange, D3; Yellow, D4. The acylated N-terminal cysteine is indicated with a red ball and placed at the inner leaflet of the OM. Lower panel, domain organization of *Wza*.

**B.** AlphaFold model of *EpsY*. Left panel, lateral view of *EpsY* monomer as predicted by AlphaFold. Right panel, superimposition of a *Wza* protomer from the solved structure (grey) and the *EpsY* model. The *EpsY* monomer aligns to the *Wza* protomer with an RMSD of

3.306Å over 904 C $\alpha$ . Right panels, AlphaFold models of ExoA and WzaB monomers. In all three AlphaFold models, the two domains are labeled D1 and D2 and colored according the homologous domains in Wza. The acylated N-terminal cysteine is indicated with a red ball; note that the acylated N-terminal cysteine of WzaB is not modeled "on top" of D2, but the confidence in the relative position of this residue is low (Figure S3C). Model rank 1 is shown for all structures. Lower panels, domain organization of EpsY, ExoA and WzaB. SPII, type 2 signal peptide.

**C.** AlphaFold-Multimer model of octameric EpsY. Left panel, one protomer is colored as in **B**. Right panel, bottom view of octameric EpsY with all protomers colored as in **B**. Model rank 1 is shown.

**D.** Structure of Wza. All eight protomers are colored as in **A**. Arrow indicates the external diameter of the  $\alpha$ -helical pore. In the bottom view, the tyrosine residues that form the so-called tyrosine ring are present in the loops extending into the central channel.

**E, F.** AlphaFold-Multimer model of a heterocomplex of octameric EpsY<sup>136-219</sup> and an EpsX monomer. In the heterocomplex, the EpsY<sup>136-219</sup> octamer is colored as D2 in **B** and EpsX is colored teal. In **E**, the right panel is a surface-rendered representation. Model rank 1 is shown. In **F**, arrows indicate the diameter of the  $\beta$ -barrel. Model rank 1 is shown.

Source data for **B**, **C**, **E** are provided in the Source Data file.



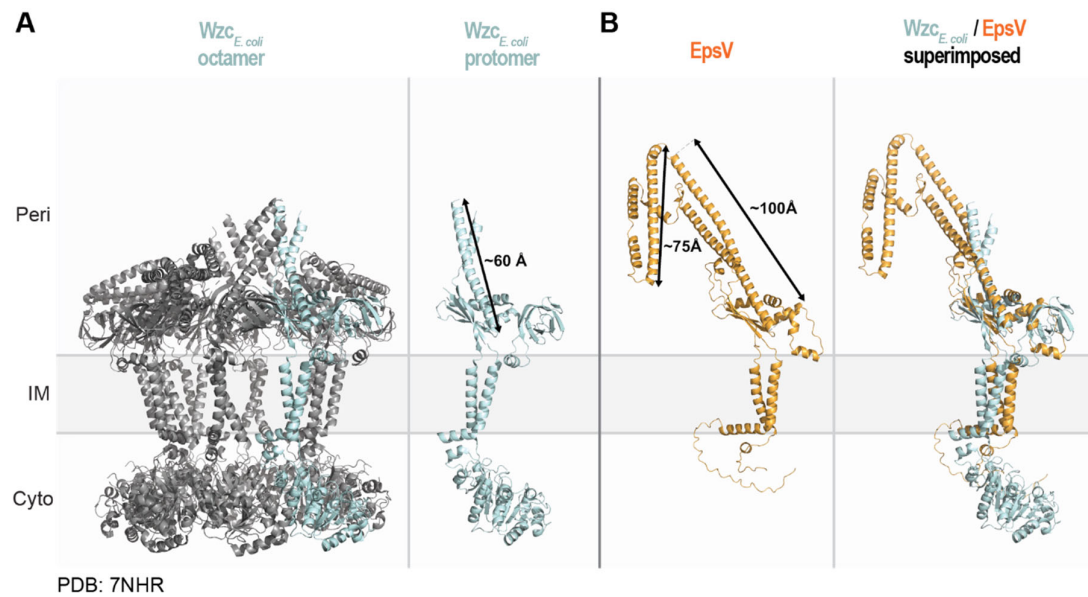

### Figure 3. Structural characterization of the PCP EpsV

**A.** The solved structure of octameric *Wzc<sub>E. coli</sub>* (PDB 7NHR)<sup>29</sup>. Left panel, the protein is colored in grey and one protomer in light blue. Right panel, individual *Wzc* protomer in class 2 conformation<sup>29</sup>. Note, that individual protomers have different conformations in the octamer. Arrow indicates the length of the extended  $\alpha$ -helical stretch.

**B.** AlphaFold model of *EpsV*. Arrows indicate the length of the  $\alpha$ -helical stretches. Model rank 1 is shown. Right panel, superimposition of a protomer from the solved structure of *Wzc* and the *EpsV* model. *EpsV* aligns to *Wzc* with an RMSD of 4.610Å over 727  $C_{\alpha}$ . Source data for **B** is provided in the Source Data file.

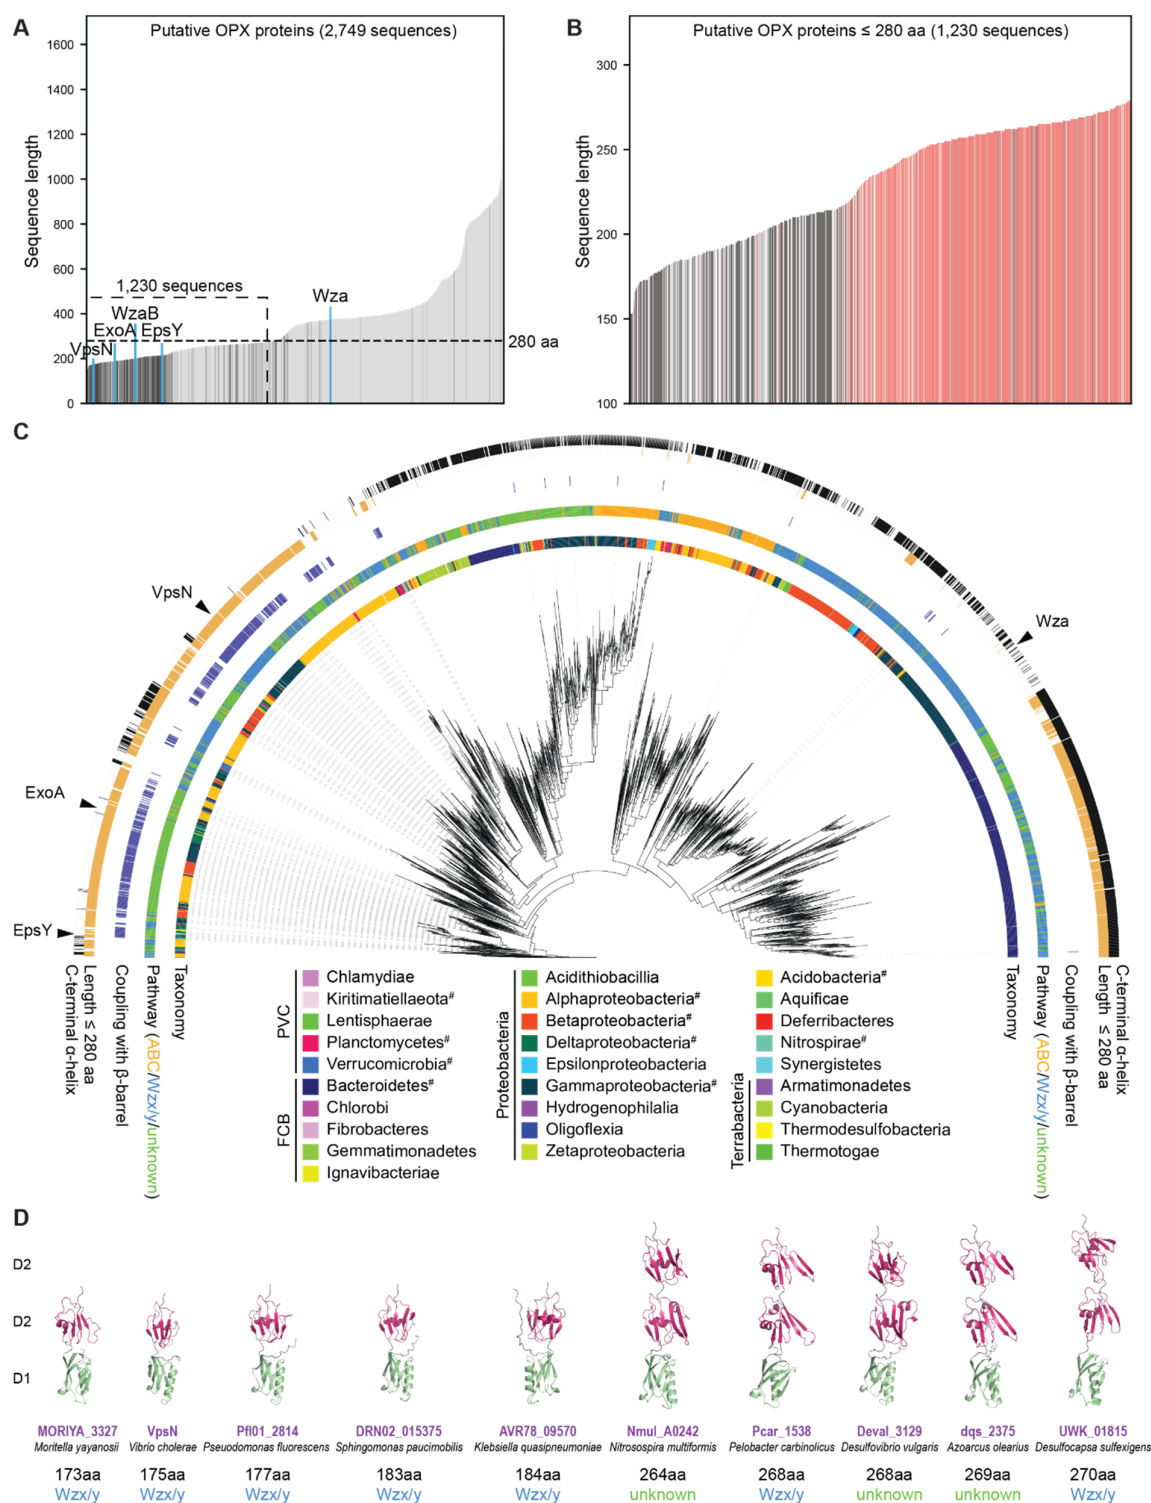

**Figure 4. Computational genomics of OPX proteins**

**A.** Length distribution of 2,749 OPX proteins. OPX proteins encoded within a distance of five genes of a gene encoding a  $\beta$ -barrel protein are shown in dark grey, and the remaining OPX proteins are in light grey. OPX proteins discussed in the text are highlighted in blue. The 1,230 short OPX proteins are indicated based on the upper size limit of  $\leq 280$  aa.

**B.** Length distribution of OPX proteins  $\leq 280$  aa. 453 OPX proteins with a coupled  $\beta$ -barrel protein and no C-terminal  $\alpha$ -helix are in dark grey; 535 OPX proteins with no coupled  $\beta$ -barrel protein but a C-terminal  $\alpha$ -helix are in red. Proteins not matching these criteria are in light grey.

**C.** Maximum-likelihood phylogenetic tree built from the PES motif of the 2,749 OPX proteins. The inner ring is colored based on NCBI taxonomy (<https://www.ncbi.nlm.nih.gov/taxonomy/>). PVC, FCB and Terrabacteria are superphyla, the phylum Proteobacteria is divided into classes. # indicates that this phylum contains OPX protein(s)  $\leq 280$  aa coupled to a  $\beta$ -barrel protein(s). The second ring indicates the pathway assigned to individual OPX proteins. The third ring indicates in dark blue coupling with a  $\beta$ -barrel protein. The fourth ring indicates in orange OPX protein  $\leq 280$  aa. The fifth ring indicates in black whether an OPX protein has a C-terminal  $\alpha$ -helix.

**D.** AlphaFold models of indicated OPX proteins. Domains are labeled D1 and D2 and colored according to the homologous domains in Wza (Figure 2A). Model rank 1 is shown for all structures.

Source data for **A**, **B**, **C**, **D** are provided in the Source Data file.

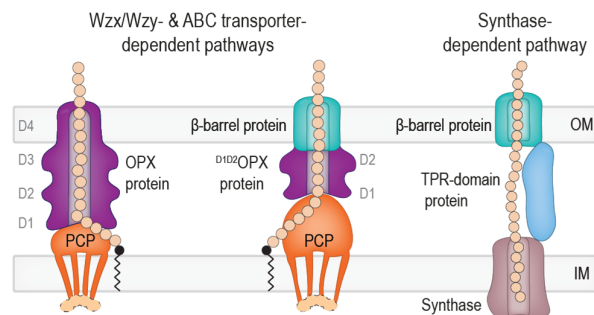

**Figure 5. Three different mechanisms for polysaccharide export across the OM**

Left schematic, in classical Wzx/Wzy- and ABC transporter-dependent pathways, polysaccharide transfer across the periplasm and OM is mediated by a complex composed of a PCP and an OPX protein with an  $\alpha$ -helical barrel in the OM. Middle schematic, in pathways in which the OPX protein lacks domain D4 ( $D^{1D2}$ OPX or  $D^{1D2D2}$ OPX proteins), a  $\beta$ -barrel protein constitutes the OM part of the composite OPX/ $\beta$ -barrel protein translocon. The D1-D4 and D1-D2 rings of the OPX proteins are indicated. In Wzx/Wzy-dependent pathways, the PCP can be associated to a cytoplasmic BY kinase (light orange). Synthesis, polymerization and translocation of the polysaccharide across the IM are not shown. Right schematic, in synthase-dependent pathways, transfer across the periplasm and the OM depends on a TPR domain-containing protein and a  $\beta$ -barrel protein translocon in the OM.
